# Supplementary material
Source: PubMed Central journal article supplement (PMC1142382)
Supplement: pnas_0502300102_4.pdf [file pnas_0502300102_4.pdf]

**Table 3. Conditions for neutral coalescent simulation under alternative demographic models**

| <b>Model</b> | <b>No. of demes (sampling among demes)</b>                                                                                                                                              | <b>Parameters of population size change, migration, and divergence among demes</b>                                                                                                                                                                                                                                                                                                                              |
|--------------|-----------------------------------------------------------------------------------------------------------------------------------------------------------------------------------------|-----------------------------------------------------------------------------------------------------------------------------------------------------------------------------------------------------------------------------------------------------------------------------------------------------------------------------------------------------------------------------------------------------------------|
| Two-epoch    | 1 (100)<br>ms 100 300 -t 108 -eN 0.01 0.1                                                                                                                                               | $\tau=0.02, \nu=0.1$                                                                                                                                                                                                                                                                                                                                                                                            |
| Bottleneck   | 1 (100)<br>ms 100 300 -t 40 -eN 0.1 0.1 -eN 0.15 0.5                                                                                                                                    | $\tau_1=0.2, \nu_1=1; \tau_2=0.1, \nu_2=0.1; \nu_3=0.5$                                                                                                                                                                                                                                                                                                                                                         |
| Island       | 10 (30 30 30 10 0 0 0 0 0 0)<br>ms 100 300 -t 2.35 -I 10 30 30 30 10 0 0 0 0 0 0 5.0                                                                                                    | $M_{ij}=5.0$ for all $i, j, i \neq j$ , equal population sizes                                                                                                                                                                                                                                                                                                                                                  |
| Complex      | 4 (30 30 30 10)<br>ms 100 300 -t 22 -I 4 30 30 30 10 5.0 -en 0.05 3 0.1 -en 0.1 3 0.5 -en 0.05 2 0.1 -en 0.1 2 0.5 -en 0.05 1 0.1 -en 0.01 4 0.05 -ej 0.012 4 3 -ej 0.5 2 1 -ej 0.5 3 1 | deme 1: $\tau_1=0.1, \nu_1=1; \nu_2=0.1$<br>deme 2: $\tau_3=0.1, \nu_3=1; \tau_4=0.1, \nu_4=0.1; \tau_5=0.8, \nu_5=0.5$<br>deme 3: $\tau_6=0.1, \nu_6=1; \tau_7=0.1, \nu_7=0.1; \tau_8=0.8, \nu_8=0.5$<br>deme 4: $\tau_9=0.02, \nu_9=1; \tau_{10}=0.004, \nu_{10}=0.05; \tau_{11}=0$<br>$M_{ij}=5.0$ for current populations $i, j, i \neq j$ ; for past populations, $M_{ij}$ scaled by past population sizes |

For each model we simulated 2,000 data sets, each composed of 100 loci sequenced at 300 unlinked genes, with complete linkage within genes, known ancestral states for each SNP, and a mutation rates selected to produce, on average, ~37,000 SNPs, which were randomly divided into putatively neutral (97.5% of SNPs) and potentially selected (2.5% of SNPs) categories. Times are scaled  $2N_1$  generations, where  $N_1$  is the current size of the first deme. For each historical population size  $N_i$ , we define  $\nu_i=N_i/N_1$ . The MS command line input for each iteration of each model is also shown (note that MS scales time in  $4N_1$  generations so all times are divided by 2).
