# Supplementary material
Source: PubMed Central journal article supplement (PMC1142382)
Supplement: pnas_0502300102_5.pdf [file pnas_0502300102_5.pdf]

**Table 4. Results of simulations under the PRF growth and selection model**

| <b>Demography</b>         | $\gamma$ | <b>Mean <math>\hat{\gamma}</math> (SD)</b> | <b>Mean <math>\hat{\tau}</math> (SD)</b> | <b>Mean <math>\hat{\nu}</math> (SD)</b> | <b>Power, %</b> |
|---------------------------|----------|--------------------------------------------|------------------------------------------|-----------------------------------------|-----------------|
| $\tau = 0.01, \nu = 0.10$ | -10      | -9.987 (1.49)                              | 0.0101 (4.37e-04)                        | 0.1004 (2.85e-03)                       | 100.00          |
|                           | -5       | -5.017 (1.56)                              | 0.0100 (4.51e-04)                        | 0.1002 (2.88e-03)                       | 90.80           |
|                           | -1       | -0.948 (1.54)                              | 0.0100 (4.38e-04)                        | 0.1003 (2.75e-03)                       | 9.50            |
|                           | 0        | -0.014 (1.60)                              | 0.0100 (4.52e-04)                        | 0.1001 (2.85e-03)                       | 5.10            |
|                           | 1        | 0.972 (1.64)                               | 0.0100 (4.70e-04)                        | 0.1002 (2.96e-03)                       | 10.00           |
|                           | 5        | 5.022 (1.81)                               | 0.0100 (4.39e-04)                        | 0.1003 (2.65e-03)                       | 87.30           |
|                           | 10       | 9.915 (2.08)                               | 0.0100 (4.45e-04)                        | 0.1001 (2.83e-03)                       | 100.00          |
| $\tau = 0.01, \nu = 0.25$ | -10      | -10.078 (0.82)                             | 0.0100 (8.89e-04)                        | 0.2494 (1.13e-02)                       | 100.00          |
|                           | -5       | -5.083 (0.66)                              | 0.0100 (9.67e-04)                        | 0.2491 (1.24e-02)                       | 100.00          |
|                           | -1       | -0.994 (0.57)                              | 0.0100 (9.20e-04)                        | 0.2495 (1.14e-02)                       | 41.50           |
|                           | 0        | -0.008 (0.61)                              | 0.0100 (9.31e-04)                        | 0.2492 (1.19e-02)                       | 5.80            |
|                           | 1        | 0.997 (0.65)                               | 0.0100 (9.24e-04)                        | 0.2495 (1.18e-02)                       | 40.00           |
|                           | 5        | 5.044 (0.93)                               | 0.0100 (9.44e-04)                        | 0.2494 (1.19e-02)                       | 100.00          |
|                           | 10       | 10.013 (1.49)                              | 0.0100 (8.99e-04)                        | 0.2499 (1.15e-02)                       | 100.00          |
| $\tau = 0.10, \nu = 0.10$ | -10      | -10.044 (1.10)                             | 0.0999 (1.96e-03)                        | 0.1000 (2.07e-03)                       | 100.00          |
|                           | -5       | -5.057 (1.18)                              | 0.0999 (1.92e-03)                        | 0.1000 (2.10e-03)                       | 98.90           |
|                           | -1       | -1.018 (1.24)                              | 0.0999 (1.95e-03)                        | 0.1000 (2.07e-03)                       | 13.50           |
|                           | 0        | -0.004 (1.29)                              | 0.1000 (1.87e-03)                        | 0.0999 (2.01e-03)                       | 6.30            |
|                           | 1        | 1.034 (1.26)                               | 0.1000 (1.94e-03)                        | 0.1001 (2.02e-03)                       | 14.30           |
|                           | 5        | 5.048 (1.39)                               | 0.0999 (1.87e-03)                        | 0.1000 (2.06e-03)                       | 96.60           |
|                           | 10       | 10.116 (1.54)                              | 0.1000 (1.95e-03)                        | 0.0999 (2.05e-03)                       | 100.00          |
| $\tau = 0.10, \nu = 0.25$ | -10      | -10.055 (0.64)                             | 0.0998 (3.04e-03)                        | 0.2500 (3.98e-03)                       | 100.00          |
|                           | -5       | -5.023 (0.55)                              | 0.1000 (3.18e-03)                        | 0.2498 (3.86e-03)                       | 100.00          |
|                           | -1       | -1.002 (0.55)                              | 0.0999 (3.09e-03)                        | 0.2500 (3.89e-03)                       | 41.80           |
|                           | 0        | -0.007 (0.59)                              | 0.0999 (3.25e-03)                        | 0.2499 (3.86e-03)                       | 6.00            |
|                           | 1        | 1.007 (0.64)                               | 0.0999 (3.08e-03)                        | 0.2500 (4.04e-03)                       | 41.20           |
|                           | 5        | 5.011 (0.86)                               | 0.0998 (3.11e-03)                        | 0.2501 (4.04e-03)                       | 100.00          |
|                           | 10       | 10.021 (1.32)                              | 0.1000 (3.23e-03)                        | 0.2498 (3.94e-03)                       | 100.00          |

Four demographic scenarios are considered corresponding to very recent ( $\tau = 0.01$ ) or recent growth ( $\tau = 0.10$ ) of very large ( $\nu = 0.10$ ) or moderate ( $\nu = 0.25$ ) effect for mutations of varying selective intensity ranging from very deleterious ( $\gamma = -10$ ) to adaptive ( $\gamma = 10$ ). In each iteration, 36,000 neutral (class 1) SNPs and 900 selected (class 2) SNPs were simulated in a sample of size  $n = 100$  chromosomes. For each parameter combination, 1,000 replicates were generated and maximum likelihood estimates retained. Power refers to the proportion of replicate data sets that reject neutrality ( $\gamma = 0$ ) for class 2 SNPs.
