# Supplementary material
Source: PubMed Central journal article supplement (PMC1142382)

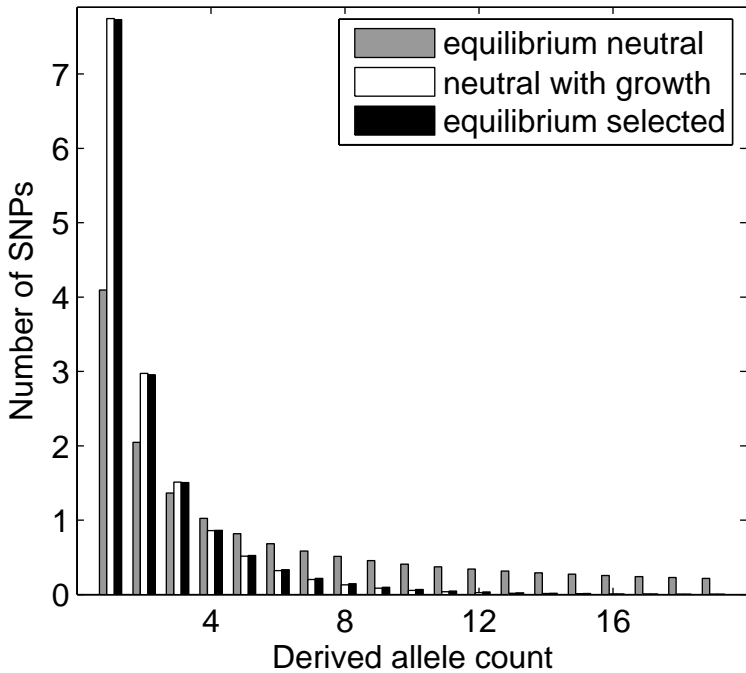

Supplement: pnas_0502300102_1.pdf [file pnas_0502300102_1.pdf]

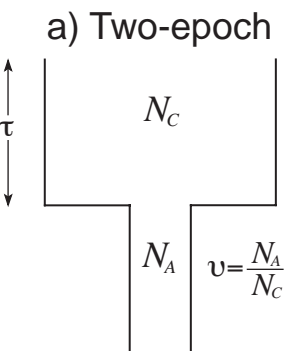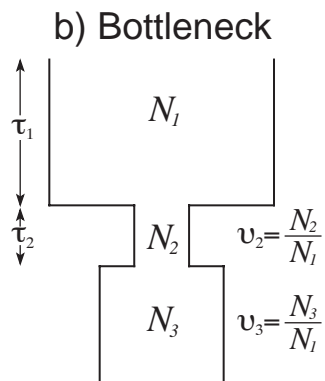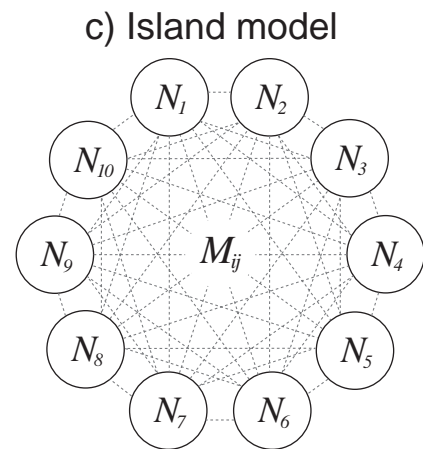

d) Complex model

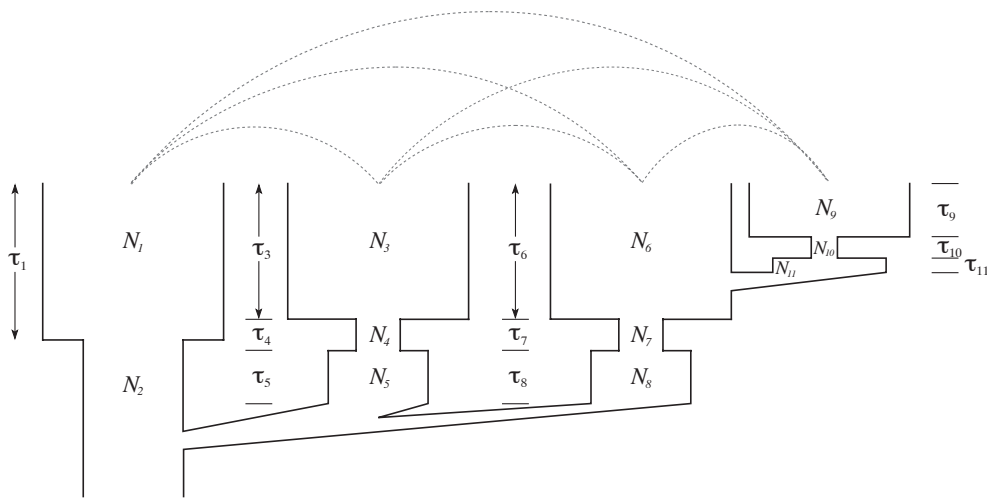

Supplement: pnas_0502300102_2.pdf [file pnas_0502300102_2.pdf]
